# Supplementary material for: Intercropped Silviculture Systems, a Key to Achieving Soil Fungal Community Management in Eucalyptus Plantations
Source: PLOS journal article supplement (doi:10.1371/journal.pone.0118515), 2015-02-23
Supplement: S1 (10.1371/journal.pone.0118515.s001) [file journal.pone.0118515.s001]

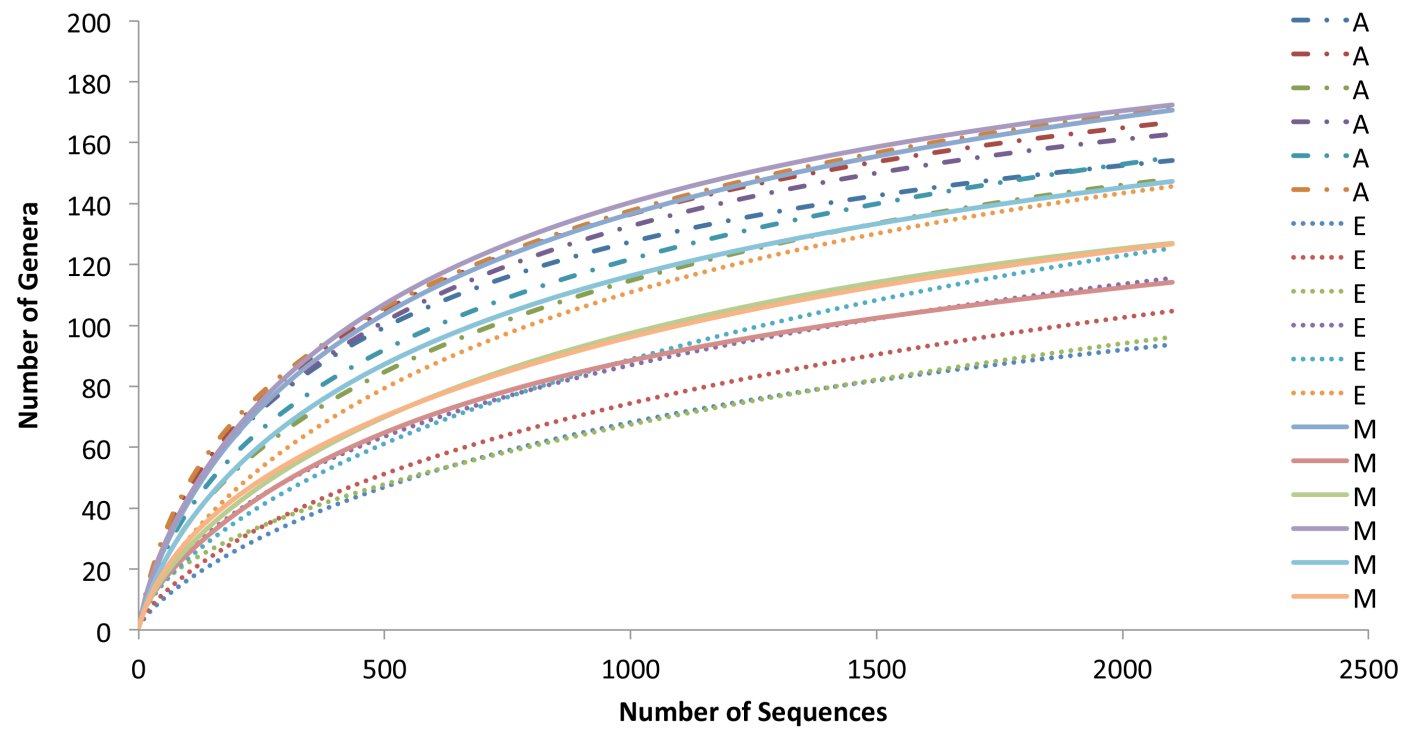

Figure S1 – Rarefaction curve of the samples from the three treatments.
